# Supplementary material for: TWIST1 expression is associated with high-risk neuroblastoma and promotes primary and metastatic tumor growth
Source: PubMed Central journal article supplement (PMC8755726; doi:10.1038/s42003-021-02958-6), 2022-01-12
Supplement: 42003_2021_2958_MOESM2_ESM.pdf [file 42003_2021_2958_MOESM2_ESM.pdf]

## Description of Additional Supplementary Files

**File name:** Supplementary Data 1

**Description:** List of all human protein coding genes detected by RNAseq, with DE genes in SK-N-Be2c-Control and -sgTWIST1 cells, ortho\_1 tumors, and in common between cells and ortho\_1 tumors.

**File name:** Supplementary Data 2

**Description:** List of pathways identified upon TWIST1 KO by GO analysis in SKN-Be2c cells and ortho\_1 tumors.

**File name:** Supplementary Data 3

**Description:** List of raw counts, DE genes deregulated by MYCN in SK-N-Be2c cells after MYCN shutdown with JQ1 for 24h (GSE80154) and pathways identified by GO analysis.

**File name:** Supplementary Data 4

**Description:** Gene lists for the identification of the TWIST1-signature.

**File name:** Supplementary Data 5

**Description:** List of the 77 genes of the TWIST1-tumor-stroma signature.

**File name:** Supplementary Data 6

**Description:** List of all proteins detected in the secretome of SK-N-Be2c-Control and -sgTWIST1 cells, the DE proteins and the deregulated pathways.

**File name:** Supplementary Data 7

**Description:** List of all murine protein coding genes detected by RNAseq in SK-N-Be2cControl and -sgTWIST1 ortho\_1 tumors, the 89 DE genes and the pathways identified by GO analysis.

**File name:** Supplementary Data 8

**Description:** Illustration of the insertions/deletions generated in the TWIST1 gene.
